# Supplementary material for: Millimeter-Wave Directed Energy-Mediated Neural Cell Injury: Insights into Protein Degradation and Cell Injury Mechanisms
Source: Research Square preprint supplement (doi:10.21203/rs.3.rs-7367389/v1), 2025-09-05
Supplement: Supplementary file 2 [file d2a3faa4383e2e1fc2123e28.xlsx]

## Sheet: DE Center+Pen v Control
Supplementary Table 1. Center vs. Control and Penumbra vs. control differential proteins with significant p-value and fold cahnge > 2 fold or < 0.5.
	Center vs. Control
Accession	Description	Control_01	Control_02	Control_03	Control_04	Control_05	Control_06	Centre_01	Centre_02	Centre_03	Centre_04					pval	Log 2 pValue	Fold Change	Log2 Fold Change	Direction
Q80ZM8	Cardiolipin synthase (CMP-forming) OS=Mus musculus OX=10090 GN=Crls1 PE=1 SV=1	0	0.000284539	0	0.000194399	3.87231e-06	0	0.000439784	0.000259092	0.000314539	0.000325299					0.00414446	7.9146	4.15913	2.05628	Increased
P28738	Kinesin heavy chain isoform 5C OS=Mus musculus OX=10090 GN=Kif5c PE=1 SV=3	0.000280946	0.00119562	0.00126051	0.00047103	0.000860446	0.00164313	0.00217722	0.00190439	0.00176311	0.00280524					0.00589125	7.40721	2.27165	1.18374	Increased
Q9ER38	Torsin-3A OS=Mus musculus OX=10090 GN=Tor3a PE=1 SV=2	0.00203091	0.00782031	0.00272104	0.00576845	0.00321016	0.0023185	0.00861095	0.00758764	0.00830637	0.00898623					0.0044585	7.80923	2.10466	1.07358	Increased
Q8QZY1	Eukaryotic translation initiation factor 3 subunit L OS=Mus musculus OX=10090 GN=Eif3l PE=1 SV=1	0.000588414	0.000855279	0.000753423	0.000515299	0.00108937	0.000756067	0.000334712	0.000276103	0.000579191	0.000216941					0.00810783	6.94647	0.46303	-1.11082	decreased
Q1HFZ0	RNA cytosine C(5)-methyltransferase NSUN2 OS=Mus musculus OX=10090 GN=Nsun2 PE=1 SV=2	0.000404399	0.000285881	0.000613269	0.000375175	0.000711431	0.000440655	0.000108361	0.000210208	0.000260065	0.000261633					0.00890612	6.81099	0.445243	-1.16733	decreased
Q8BI84	Transport and Golgi organization protein 1 homolog OS=Mus musculus OX=10090 GN=Mia3 PE=1 SV=2	0.00271299	0.00169746	0.00151322	0.00232051	0.00361448	0.00124521	0.000707532	0.00126445	0.000618686	0.000624015					0.010718	6.54382	0.367985	-1.44228	decreased
Q9DCL9	Bifunctional phosphoribosylaminoimidazole carboxylase/phosphoribosylaminoimidazole succinocarboxamide synthetase OS=Mus musculus OX=10090 GN=Paics PE=1 SV=4	0.00225199	0.000331577	0.00526513	0.00180552	0.00291123	0.00401392	0.00106161	0.00116946	0.000992039	0.00031864					0.0443547	4.49477	0.320435	-1.64189	decreased
P11031	Activated RNA polymerase II transcriptional coactivator p15 OS=Mus musculus OX=10090 GN=Sub1 PE=1 SV=3	0.000687964	0.000563959	0.00154887	0.000840493	0.00129916	0.00135091	0.00041385	0.000249522	0.00010465	0.00048268					0.00511424	7.61126	0.298195	-1.74567	decreased
Q9DD03	Ras-related protein Rab-13 OS=Mus musculus OX=10090 GN=Rab13 PE=1 SV=1	0.00601224	0.00844129	0.00794085	0.0085779	0.0084931	0.0147126	0.0043232	0.000744531	0.000733548	0.00102866					0.00117233	9.73641	0.189097	-2.4028	decreased
O08539	Myc box-dependent-interacting protein 1 OS=Mus musculus OX=10090 GN=Bin1 PE=1 SV=1	0.000149289	6.26278e-05	9.5126e-06	6.28638e-05	0.000151128	0.000198693	6.34271e-05	0	0	4.05424e-06					0.0327771	4.93117	0.160641	-2.63809	decreased
Q9DCB1	High mobility group nucleosome-binding domain-containing protein 3 OS=Mus musculus OX=10090 GN=Hmgn3 PE=1 SV=1	0.00075639	0.000224449	0.000699302	0.000294447	0.000703504	0.000320645	0	0.000248469	5.1456e-06	1.0611e-05					0.00637102	7.29426	0.132169	-2.91955	decreased
Q61166	Microtubule-associated protein RP/EB family member 1 OS=Mus musculus OX=10090 GN=Mapre1 PE=1 SV=3	0.0002786	0.000439587	0.00182087	0.000261491	0.0013492	0.000824274	0	2.44563e-05	3.25887e-05	0.000180514					0.0499862	4.32233	0.0757636	-3.72235	decreased
	Penumbra vs. Control
Accession	Description	Control_01	Control_02	Control_03	Control_04	Control_05	Control_06	Penumbra_01	Penumbra_02	Penumbra_03	Penumbra_04	Penumbra_05	Penumbra_06	Penumbra_07	Penumbra_08	pval	Log 2 pValue	fold_change	Log2 Fold Change	Direction
Q8BG81	Polymerase delta-interacting protein 3 OS=Mus musculus OX=10090 GN=Poldip3 PE=1 SV=1	0.000290786	0.00223017	0.0017614	0.000363282	0.000971826	0.0031328	0.00389455	0.00896817	0.00481315	0.0186267	0.00293575	0.00497234	0.00561275	0.00589757	0.0173572	5.84832	4.77594	2.25578	Increased
P26350	Prothymosin alpha OS=Mus musculus OX=10090 GN=Ptma PE=1 SV=2	6.30361e-05	0.000394265	0.000113204	0.000260901	0.000174162	0	0.000222951	0.00081084	2.85808e-05	0.00053451	0.00121944	0.000921731	0.000703621	0.000417085	0.0154272	6.01838	3.62389	1.85754	Increased
O55128	Histone deacetylase complex subunit SAP18 OS=Mus musculus OX=10090 GN=Sap18 PE=1 SV=1	0.000334844	0.00131926	0.000287733	0.000261776	0.0013162	0.000147856	0.00139771	0.00215699	0.00349622	0.00285648	0.0014196	0.00211625	0.000357699	0.000270074	0.0299576	5.06093	2.87737	1.52475	Increased
Q6P5H2	Nestin OS=Mus musculus OX=10090 GN=Nes PE=1 SV=1	0.00210173	0.00416357	0.00288397	0.00254473	0.00229997	0.00289909	0.00606818	0.00559613	0.00309965	0.0085685	0.00841957	0.00904356	0.0112337	0.00849946	0.000804242	10.2801	2.68729	1.42615	Increased
Q641P0	Actin-related protein 3B OS=Mus musculus OX=10090 GN=Actr3b PE=1 SV=1	0.000211478	0.000280045	0	0.000253954	0.000178565	0	0.000370188	0.000186874	0.000259018	0.000266891	0.00011853	0.000502598	0.000448946	0.000342633	0.0408555	4.61333	2.02562	1.01836	decreased
Q8QZY1	Eukaryotic translation initiation factor 3 subunit L OS=Mus musculus OX=10090 GN=Eif3l PE=1 SV=1	0.000588414	0.000855279	0.000753423	0.000515299	0.00108937	0.000756067	0.000231338	0.00037976	0.000381654	0.000357527	0.000501712	0.000227301	0.000377826	0.000385589	0.0032377	8.27082	0.467772	-1.09612	decreased
P70195	Proteasome subunit beta type-7 OS=Mus musculus OX=10090 GN=Psmb7 PE=1 SV=1	0.00235012	0.00111779	0.00121424	0.00259261	0.00209989	0.000763256	0.000438169	0.00057464	0.000551865	0.000325856	0.00130823	0.00104108	0.00126601	0.000748684	0.0306452	5.0282	0.462709	-1.11182	decreased
Q923D5	WW domain-binding protein 11 OS=Mus musculus OX=10090 GN=Wbp11 PE=1 SV=2	0.000172323	0.000221863	0.000259164	5.20838e-05	0.000215661	8.47769e-05	0.000108635	7.72972e-05	4.60107e-05	6.43763e-05	6.63291e-05	6.62424e-05	9.7667e-05	3.39194e-05	0.0325895	4.93945	0.417904	-1.25876	decreased
Q9JLV1	BAG family molecular chaperone regulator 3 OS=Mus musculus OX=10090 GN=Bag3 PE=1 SV=2	0.00185816	0.00119057	0.00366693	0.00131631	0.00474619	0.00321218	0.00111364	0.000534754	0.00121493	0.00141026	0.000931272	0.000902878	0.00123057	0.00151109	0.0442213	4.49911	0.415066	-1.26859	decreased
P61089	Ubiquitin-conjugating enzyme E2 N OS=Mus musculus OX=10090 GN=Ube2n PE=1 SV=1	0.00322106	0.00339962	0.00488628	0.00441898	0.00773326	0.00385988	0.000188973	0.00465143	0.000247377	0.000219959	0.00183718	0.00280032	0.00174926	0.00181762	0.00718976	7.11984	0.368257	-1.44121	decreased
Q9DD03	Ras-related protein Rab-13 OS=Mus musculus OX=10090 GN=Rab13 PE=1 SV=1	0.00601224	0.00844129	0.00794085	0.0085779	0.0084931	0.0147126	0.00325739	0.0015547	0.00172697	0.00349749	0.00211375	0.00510401	0.00275891	0.00358771	0.0028164	8.47193	0.326714	-1.6139	decreased
O70480	Vesicle-associated membrane protein 4 OS=Mus musculus OX=10090 GN=Vamp4 PE=1 SV=1	0.000112662	5.26702e-05	0.000216896	0.000106881	0.000175985	4.12618e-05	6.48984e-05	1.87896e-05	1.60186e-05	2.67283e-05	1.94061e-05	6.68795e-05	2.07222e-05	6.82355e-05	0.0342169	4.86915	0.320318	-1.64242	decreased
P11031	Activated RNA polymerase II transcriptional coactivator p15 OS=Mus musculus OX=10090 GN=Sub1 PE=1 SV=3	0.000687964	0.000563959	0.00154887	0.000840493	0.00129916	0.00135091	0.000139114	8.14551e-05	0.00016141	0.000326149	0.000376011	0.00021026	0.00046767	0.000514256	0.00428811	7.86544	0.271363	-1.8817	decreased
P62307	Small nuclear ribonucleoprotein F OS=Mus musculus OX=10090 GN=Snrpf PE=1 SV=1	0.00146596	0.00123914	0.00166045	0.00108498	0.00194524	0.000244095	0	0.000547623	0	0.000554284	0	0.000508842	0.000430261	0.000624962	0.00922075	6.7609	0.261717	-1.93392	decreased
